# Supplementary material for: Significant spatial and temporal variation of the concentrations and chemical composition of ultrafine particulate matter over Europe
Source: Copernicus journal article supplement (doi:10.5194/egusphere-2024-3357), 2024-11-07
Supplement: Supplementary file 1 [file egusphere-2024-3357-supplement.pdf]

# Concentrations and chemical composition of ultrafine particulate matter over Europe

Konstantinos Mataras<sup>1</sup>, Evangelia Siouti<sup>2</sup>, David Patoulias<sup>2</sup> and Spyros N. Pandis<sup>1,2</sup>

<sup>1</sup>Department of Chemical Engineering, University of Patras, Patras, Greece

<sup>2</sup>Institute of Chemical Engineering Sciences (ICE-HT), Foundation for Research and Technology Hellas (FORTH), Patras, Greece

**Table S1.** PMCAMx-UF daily prediction skill metrics of PV<sub>0.1</sub> in ( $\mu\text{m}^3 \text{cm}^{-3}$ ) during 5 June - 8 July 2012 for the 12 measurement sites.

| <b>Station</b>   | <b>Mean Predicted</b><br>( $\mu\text{m}^3 \text{cm}^{-3}$ ) | <b>Mean Observed</b><br>( $\mu\text{m}^3 \text{cm}^{-3}$ ) | <b>NMB</b><br>(%) | <b>NME</b><br>(%) |
|------------------|-------------------------------------------------------------|------------------------------------------------------------|-------------------|-------------------|
| Dresden          | 0.42                                                        | 0.59                                                       | -29               | 32                |
| Kosetice         | 0.39                                                        | 0.26                                                       | 53                | 57                |
| Hohenpeissenberg | 0.21                                                        | 0.26                                                       | -19               | 36                |
| Mace Head        | 0.05                                                        | 0.06                                                       | -15               | 64                |
| Finokalia        | 0.39                                                        | 0.36                                                       | 6                 | 29                |
| Vavihill         | 0.47                                                        | 0.28                                                       | 66                | 69                |
| Helsinki         | 0.44                                                        | 0.48                                                       | -9                | 29                |
| Melpitz          | 0.41                                                        | 0.33                                                       | 24                | 38                |
| Hyytiala         | 0.23                                                        | 0.23                                                       | -0.5              | 46                |
| Waldhof          | 0.50                                                        | 0.31                                                       | 63                | 66                |
| Aspvreten        | 0.48                                                        | 0.23                                                       | 109               | 115               |
| Varrjo           | 0.10                                                        | 0.10                                                       | -4                | 49                |

**Table S2.** PMCAM<sub>x</sub>-UF daily prediction skill metrics of PV<sub>0.1</sub> in ( $\mu\text{m}^3 \text{cm}^{-3}$ ) during 1-30 January 2009 for the 12 measurement sites.

| <b>Station</b>   | <b>Mean Predicted</b><br>( $\mu\text{m}^3 \text{cm}^{-3}$ ) | <b>Mean Observed</b><br>( $\mu\text{m}^3 \text{cm}^{-3}$ ) | <b>NMB</b><br>(%) | <b>NME</b><br>(%) |
|------------------|-------------------------------------------------------------|------------------------------------------------------------|-------------------|-------------------|
| Dresden          | 0.26                                                        | 1.05                                                       | -76               | 76                |
| Kosetice         | 0.24                                                        | 0.46                                                       | -47               | 52                |
| Hohenpeissenberg | 0.15                                                        | 0.19                                                       | -18               | 36                |
| Mace Head        | 0.02                                                        | 0.09                                                       | -80               | 80                |
| Finokalia        | 0.07                                                        | 0.14                                                       | -52               | 60                |
| Vavihill         | 0.24                                                        | 0.21                                                       | 13                | 59                |
| Helsinki         | 0.18                                                        | 0.35                                                       | -47               | 59                |
| Melpitz          | 0.27                                                        | 0.28                                                       | -3                | 46                |
| Hyytiala         | 0.16                                                        | 0.07                                                       | 130               | 174               |
| Waldhof          | 0.26                                                        | 0.27                                                       | -5                | 40                |
| Aspvreten        | 0.11                                                        | 0.08                                                       | 28                | 99                |
| Varrio           | 0.09                                                        | 0.02                                                       | 399               | 424               |

**Table S3.** Average predicted total concentration of PM<sub>0.1</sub> secondary organic aerosol ( $\mu\text{g m}^{-3}$ ) and its anthropogenic, biogenic and extremely low volatility fractions during 5 June - 8 July 2012.

| Site       | Mean total SOA<br>( $\mu\text{g m}^{-3}$ ) | Anthropogenic SOA<br>(%) | Biogenic SOA (%) | ELSOA (%) |
|------------|--------------------------------------------|--------------------------|------------------|-----------|
| Athens     | 0.26                                       | 64.7                     | 27.6             | 7.7       |
| Patra      | 0.19                                       | 59.5                     | 29.5             | 11.0      |
| Finokalia  | 0.16                                       | 72.6                     | 20.6             | 6.8       |
| Montseny   | 0.34                                       | 53.9                     | 29.4             | 16.7      |
| Paris      | 0.18                                       | 49.7                     | 28.8             | 21.5      |
| Zurich     | 0.22                                       | 50.0                     | 30.2             | 19.8      |
| Ispra      | 0.35                                       | 53.3                     | 29.8             | 16.9      |
| Bucharest  | 0.41                                       | 53.5                     | 35.6             | 10.9      |
| Helsinki   | 0.28                                       | 39.7                     | 35.1             | 25.2      |
| Birmingham | 0.13                                       | 49.6                     | 26.0             | 24.4      |

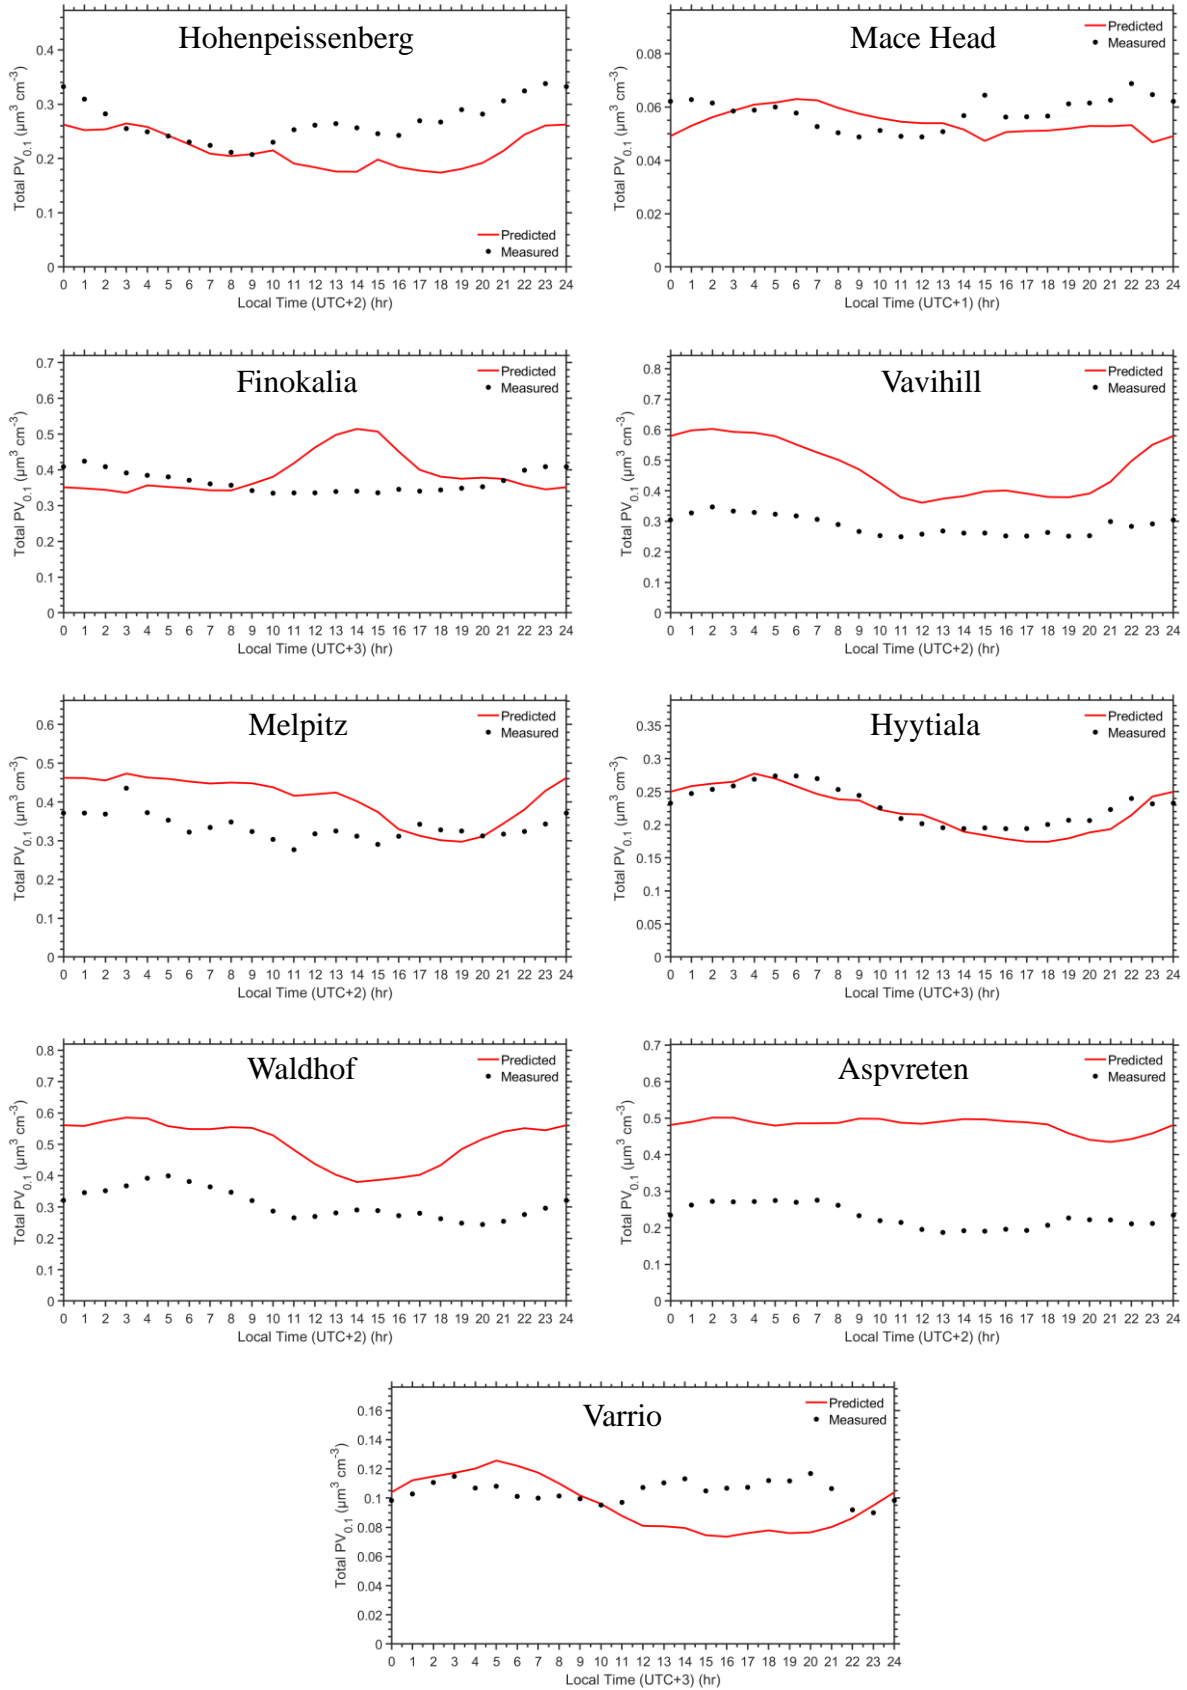

**Figure S1.** Average diurnal profile of predicted and measured total volume concentrations in  $\mu\text{m}^3 \text{cm}^{-3}$  for the period of 5 June - 8 July 2012 in different sites.

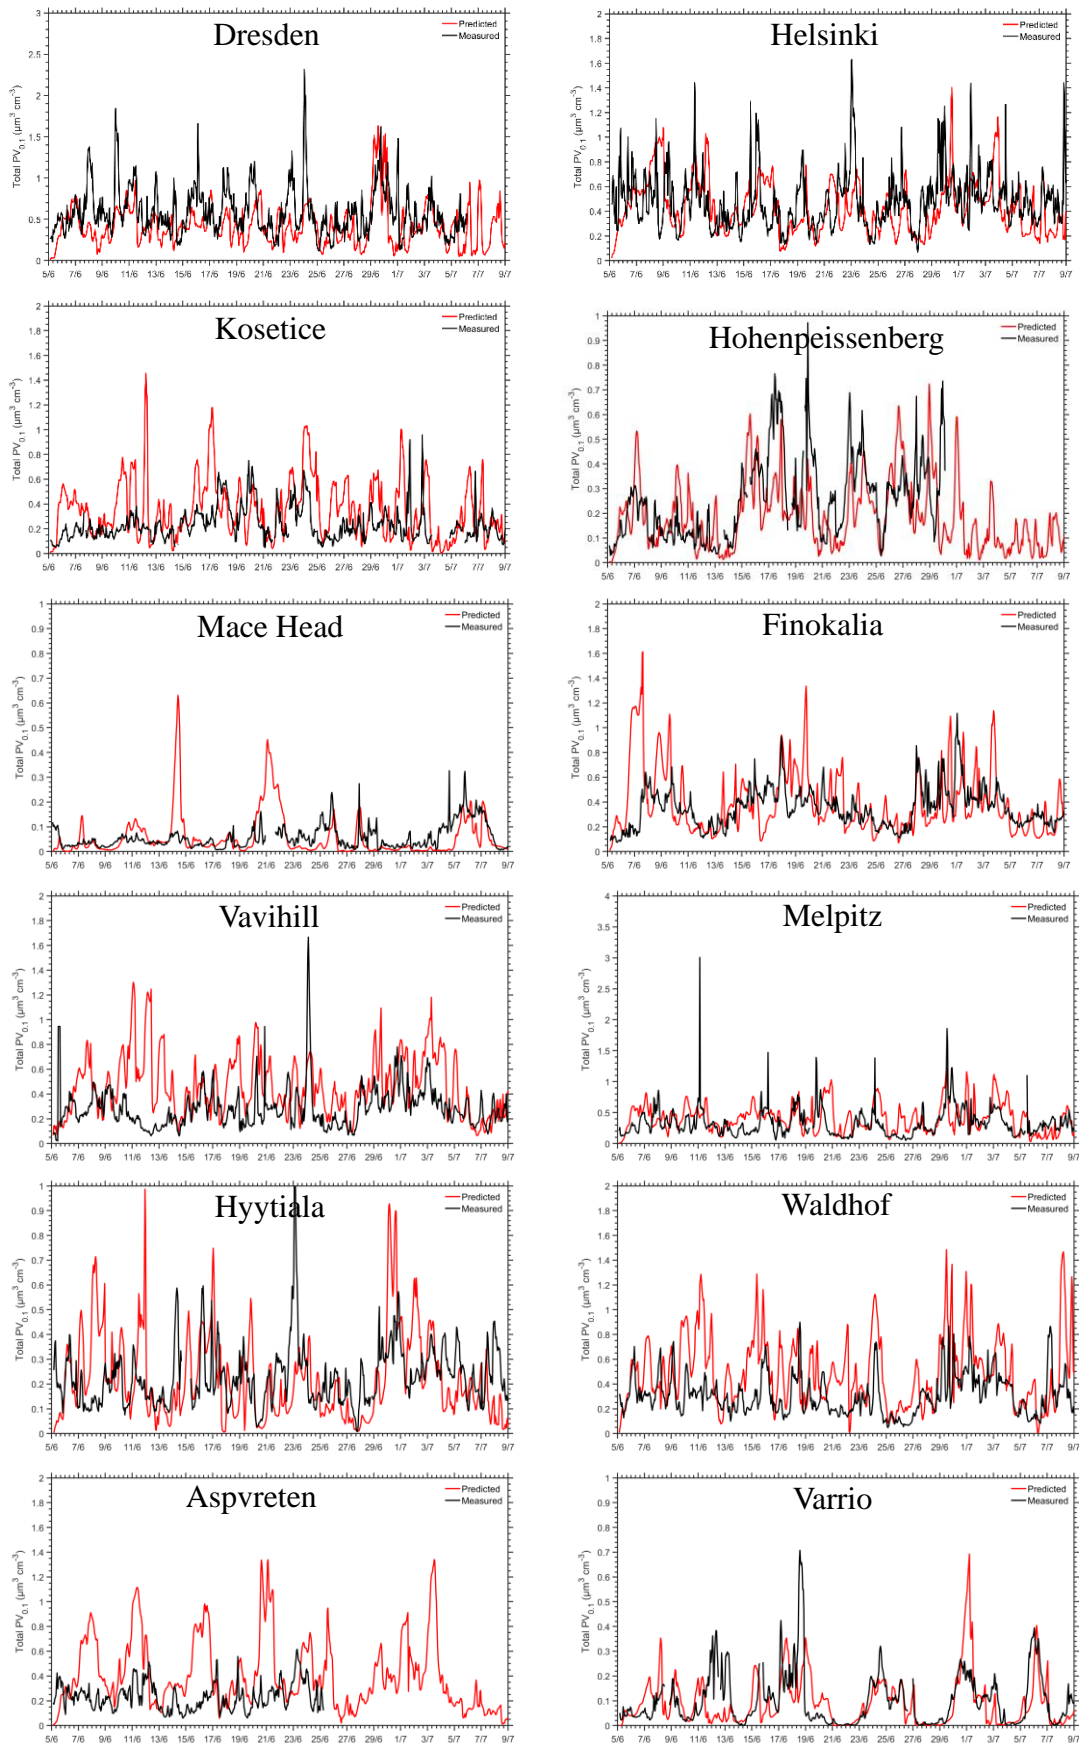

**Figure S2.** Timeseries of predicted and measured total volume concentrations in  $\mu\text{m}^3 \text{cm}^{-3}$  for the period of 5 June - 8 July 2012 in different sites.

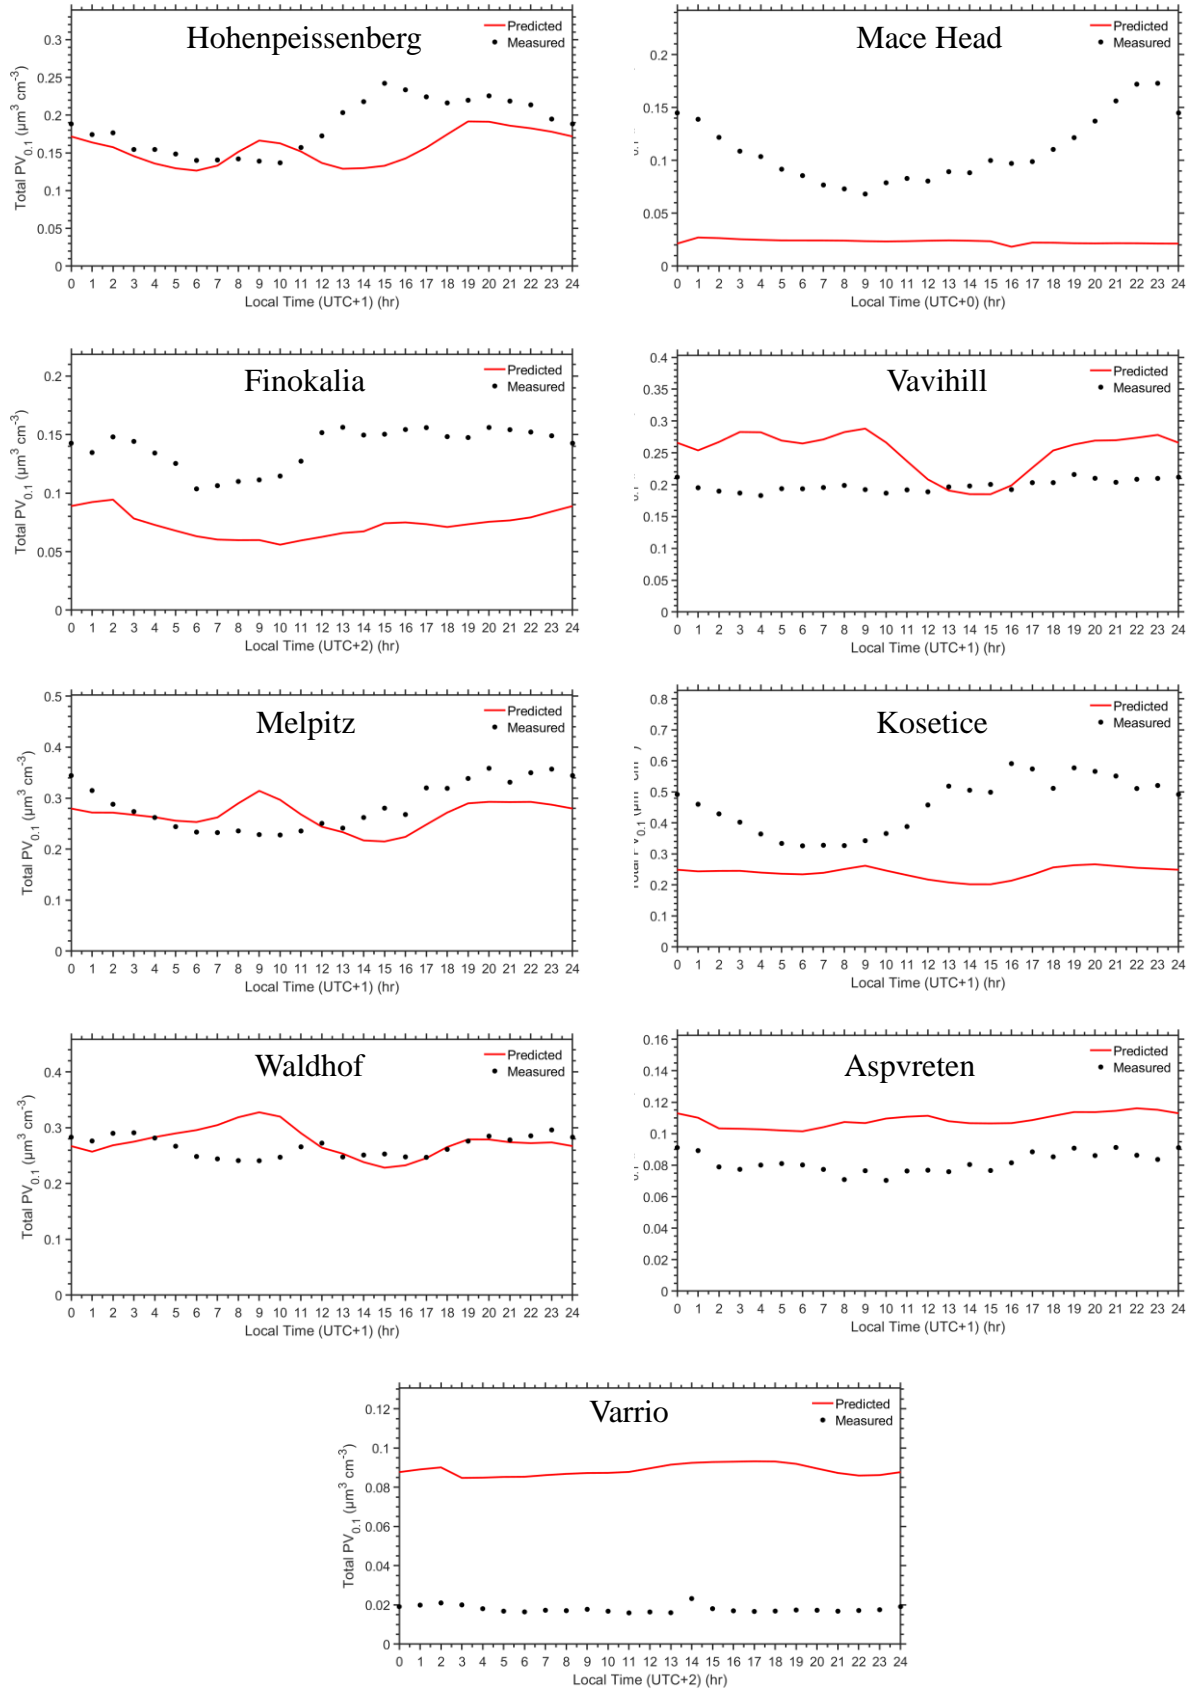

**Figure S3.** Average diurnal profile of predicted and measured total volume concentrations in  $\mu\text{m}^3 \text{cm}^{-3}$  for the period of 1-30 January 2009 in different sites.

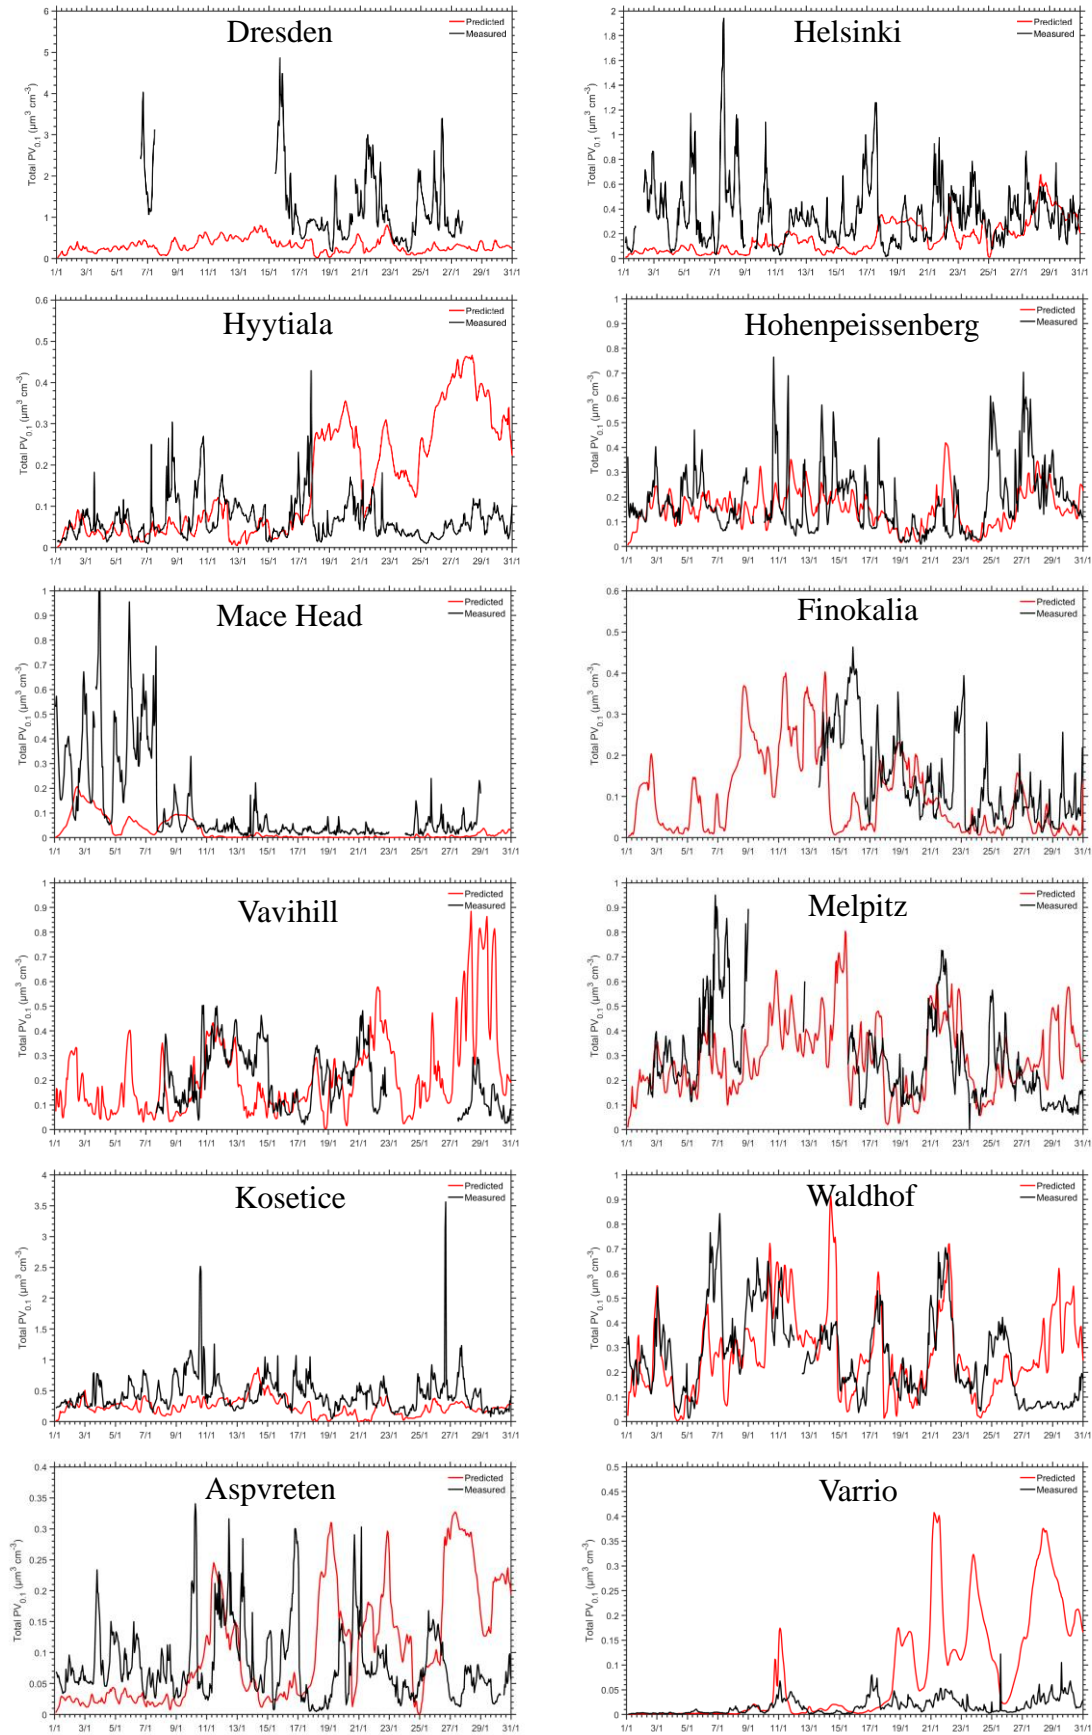

**Figure S4.** Timeseries of predicted and measured total volume concentrations in  $\mu\text{m}^3 \text{cm}^{-3}$  for the period of 1-30 January 2009 in different sites.

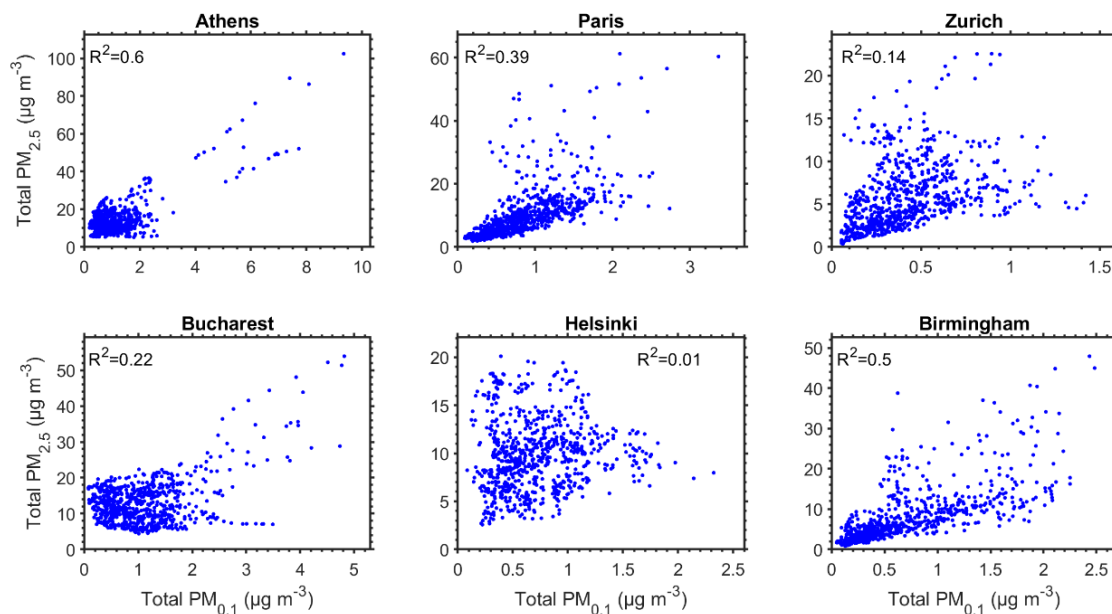

**Figure S5.** Correlation plots for predicted PM<sub>2.5</sub> and PM<sub>0.1</sub> in major cities during the period of 5 June - 8 July 2012. R<sup>2</sup> values correspond to the square of the samples Pearson's correlation coefficient R.



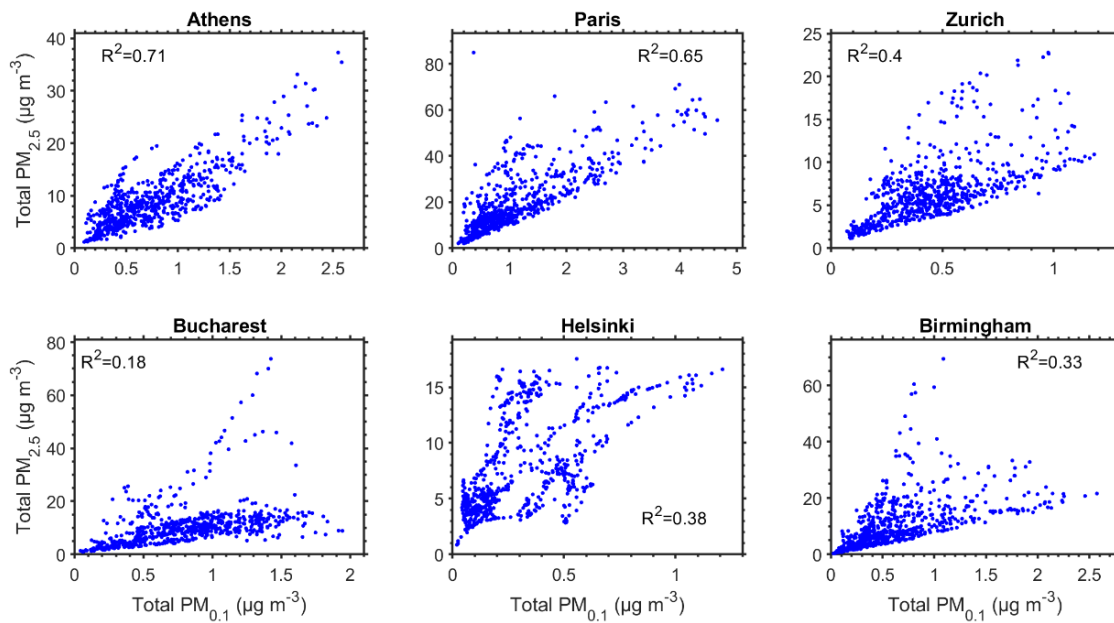

**Figure S6.** Correlation plots for predicted PM<sub>2.5</sub> and PM<sub>0.1</sub> in major cities during the period of 1-30 January 2009. R<sup>2</sup> values correspond to the square of the samples Pearson's correlation coefficient R.
